# Supplementary material for: To investigate the effect of a high-fat diet on pharmacokinetics/renal function/RAAS-related parameters after a single dose of empagliflozin in healthy Chinese adults
Source: Research Square preprint supplement (doi:10.21203/rs.3.rs-7748740/v1), 2025-10-27
Supplement: Supplementary file 1 [file 3a7223689c6771cc13bd573b.docx]

Supplementary Table 3. Pharmacokinetic Parameters of T and R after Oral Administration of 10 mg Empagliflozin in the Fed condition

| PK parameters | Unit | Test formulation T  (n = 29) | Reference formulation R  (n = 29) | T/R GMR  (90% CI)% |
| --- | --- | --- | --- | --- |
| Tmax | h | 2.00 ± 1.05 | 1.90 ± 0.92 | / |
| Cmax | ng/mL | 117.91 ± 29.04 | 118.09 ± 25.69 | 98.31  (90.53~106.75) |
| AUC0-t | ng·h/mL | 1004.83 ± 180.88 | 973.19 ± 157.17 | 100.81  (98.24~103.44) |
| AUC0-∞ | ng·h/mL | 1036.18 ± 185.99 | 1000.07 ± 161.42 | 101.10  (98.24~103.44) |
| AUC_%Extrap | % | 3.02 ± 1.68 | 2.68 ± 1.00 | / |
| t1/2 | h | 9.36 ± 2.87 | 8.52 ± 1.29 | / |
| λz | 1/hr | 0.08 ± 0.01 | 0.08 ± 0.01 | / |

Notes: Data are presented as mean ± standard deviation. Tmax: Time to reach peak concentration; Cmax: Peak concentration; AUC0-t: Area under the plasma concentration-time curve from time zero to the last measurable concentration at time t; AUC0-∞: Area under the plasma concentration-time curve from time zero extrapolated to infinity; AUC-%Extrap: Percentage of extrapolated area; t1/2: Elimination half-life; λz: Elimination rate constant; T: Test formulation; R: Reference formulation; GMR: Geometric mean ratio; CI: Confidence interval.
