# Supplementary material for: To investigate the effect of a high-fat diet on pharmacokinetics/renal function/RAAS-related parameters after a single dose of empagliflozin in healthy Chinese adults
Source: Research Square preprint supplement (doi:10.21203/rs.3.rs-7748740/v1), 2025-10-27
Supplement: Supplementary file 1 [file b3ee440a80588c9f13d8e690.pdf]

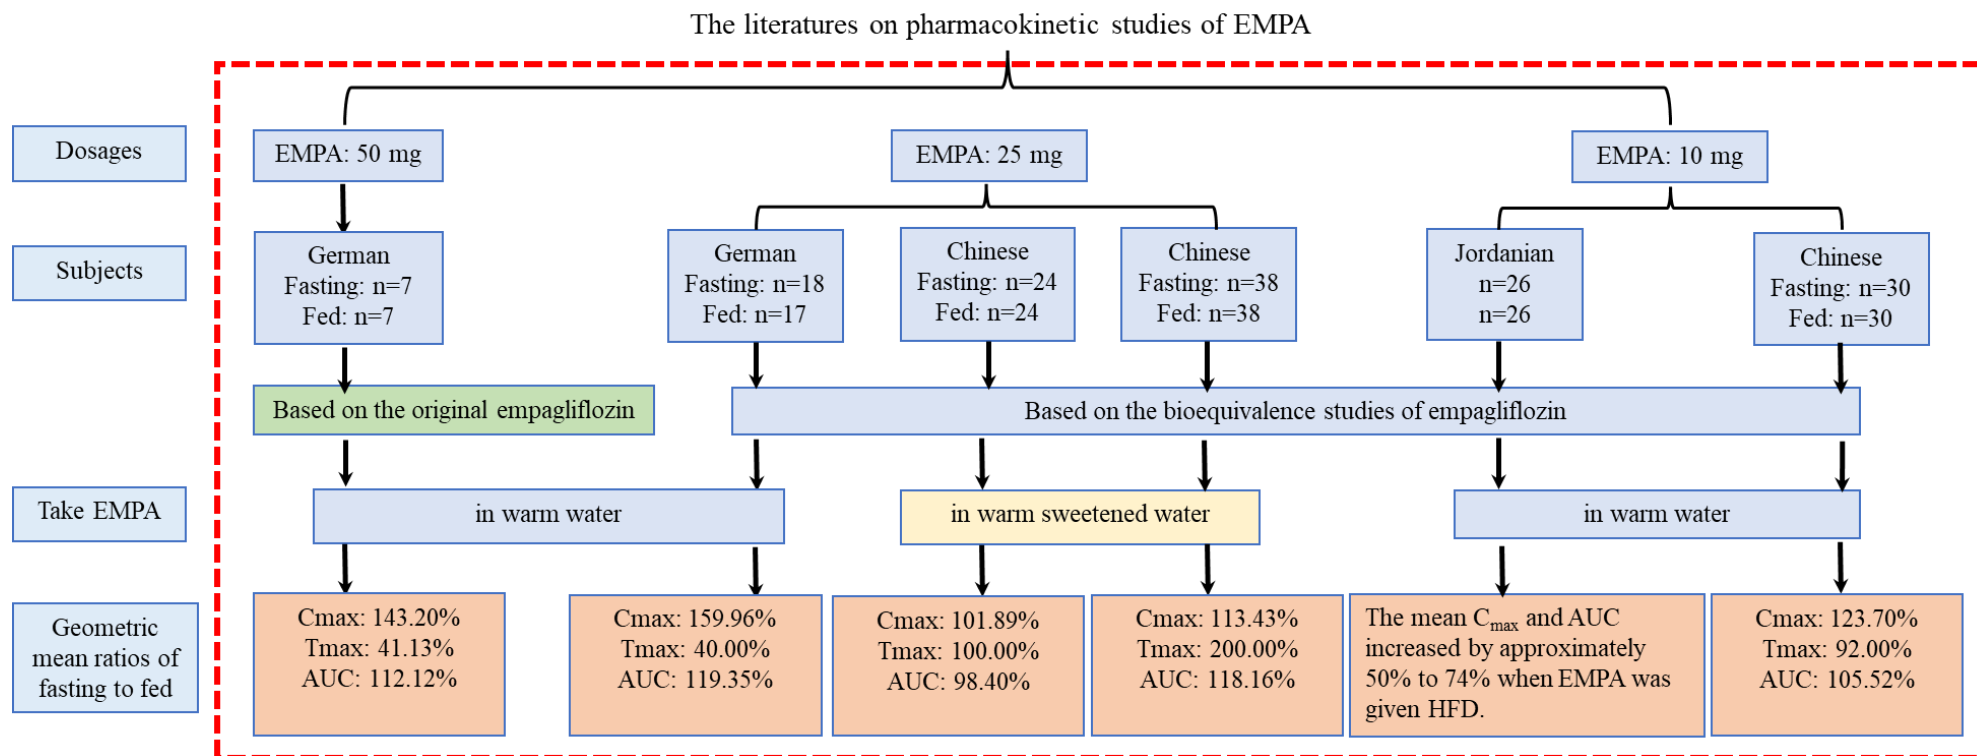

Supplementary Figure 1 Analysis of the pharmacokinetic studies of empagliflozin

Notes: EMPA, empagliflozin. C<sub>max</sub>, the maximum plasma concentration. T<sub>max</sub>, the time to reach C<sub>max</sub>. AUC, area under time-concentration curve.
