# Supplementary material for: To investigate the effect of a high-fat diet on pharmacokinetics/renal function/RAAS-related parameters after a single dose of empagliflozin in healthy Chinese adults
Source: Research Square preprint supplement (doi:10.21203/rs.3.rs-7748740/v1), 2025-10-27
Supplement: Supplementary file 2 [file b300c609e6e9dbd8b6181f10.docx]

Supplementary Table 2. Pharmacokinetic Parameters of T and R after Oral Administration of 10 mg Empagliflozin in the Fasting condition

| PK parameters | Unit | Test formulation T  (n = 28) | Reference formulation R  (n = 28) | T/R GMR  (90% CI)% |
| --- | --- | --- | --- | --- |
| Tmax | h | 1.59 ± 0.74 | 1.41 ± 0.48 | / |
| Cmax | ng/mL | 184.25 ± 32.77 | 194.21 ± 38.22 | 94.59  (88.23~101.41) |
| AUC0-t | ng·h/mL | 1337.74 ± 198.09 | 1347.19 ± 197.00 | 99.00  (96.27~101.81) |
| AUC0-∞ | ng·h/mL | 1362.77 ± 200.48 | 1375.74 ± 206.98 | 98.88  (96.21~101.63) |
| AUC_%Extrap | % | 1.86 ± 0.79 | 2.01 ± 1.00 | / |
| t1/2 | h | 8.28 ± 1.71 | 8.41 ± 1.86 | / |
| λz | 1/hr | 0.09 ± 0.02 | 0.09 ± 0.02 | / |

Notes: Data are presented as mean ± standard deviation. Tmax: Time to reach peak concentration; Cmax: Peak concentration; AUC0-t: Area under the plasma concentration-time curve from time zero to the last measurable concentration at time t; AUC0-∞: Area under the plasma concentration-time curve from time zero extrapolated to infinity; AUC-%Extrap: Percentage of extrapolated area; t1/2: Elimination half-life; λz: Elimination rate constant; T: Test formulation; R: Reference formulation; GMR: Geometric mean ratio; CI: Confidence interval.
