# Supplementary material for: To investigate the effect of a high-fat diet on pharmacokinetics/renal function/RAAS-related parameters after a single dose of empagliflozin in healthy Chinese adults
Source: Research Square preprint supplement (doi:10.21203/rs.3.rs-7748740/v1), 2025-10-27
Supplement: Supplementary file 3 [file b65103a18baf248e43ad9704.docx]

Supplementary Table 1. Components list of the high-fat diet

| Food name | Weight/Volume | Protein  (g) | Fat  (g) | Carbohydrates  (g) | Total calories  (kcal) |
| --- | --- | --- | --- | --- | --- |
| Bread with butter | 60 g (bread) | 5.22 | 6.72 | 33.6 | 215.76 |
| 20 g (butter) | 0.11 | 16.6 | 0.11 | 150.28 |
| Steamed egg custard | 100 g (net) | 12.8 | 11.1 | 0.7 | 153.9 |
| Ham sausage | 120 g | 15 | 16.8 | 8.4 | 244.8 |
| Pure milk | 250 mL | 8 | 10 | 12 | 170 |
| Total weight (g)/  Total calories (kcal) | / | 41.13/  164.52 | 61.22/  550.98 | 54.81/  219.24 | 934.74 |
